# The myosin superfamily at a glance

M. Amanda Hartman<sup>1</sup> and James A. Spudich<sup>1,\*</sup>

Department of Biochemistry, Stanford University, 279 Campus Drive, Stanford, CA 94305, USA

\*Author for correspondence ([jspudich@stanford.edu](mailto:jspudich@stanford.edu))

*Journal of Cell Science* 125, 1627–1632  
 © 2012. Published by The Company of Biologists Ltd  
 doi: 10.1242/jcs.094300

The cytoskeleton is an interconnected network that provides support and organization to cells. In eukaryotes, its main components include actin and microtubules, two types of dynamic filaments. In addition to carrying out structural roles, these filaments act as tracks for the movement of molecular motors that convert chemical energy into

mechanical work as they transport and/or anchor organelles, vesicles and other intracellular components. Kinesin and dynein motors both utilize microtubules for transport, whereas myosins – which are the focus of this Cell Science at a Glance article – are the only known actin-based motor proteins (Goode et al., 2000; Hartman et al., 2011; Ross et al., 2008). Different members of the myosin family are typically denoted by roman numerals, such as myosin II and myosin V; to ensure consistency between the accompanying poster and the text, we refer to them here as M2 (or class 2) and M5 (or class 5), respectively.

The myosin superfamily is a large and diverse protein family, and its members, which are grouped into many classes (Foth et al., 2006; Odrionitz and Kollmar, 2007), are involved in a number of cellular pathways (Krendel and Mooseker, 2005; Woolner and Bement, 2009). We

first describe the basics of myosin mechanoenzymology and motility. Next, we discuss myosin–cargo interactions and present a summary of the roles of myosin proteins in cells, focusing on actin-based projections and the endomembrane system. Finally, we provide an overview of the diseases associated with myosin mutations and our perspective on the future of the myosin field. In order to provide a general overview of the myosin family, we will not be able to discuss some aspects of the vast and important literature on myosins. For example, we will not focus on the large body of literature on yeast myosins, as it deserves a rather long review on its own.

Myosins are mechanoenzymes  
 Myosins contain actin- and ATP-binding sites in their conserved catalytic head domains. Conformational changes associated with nucleotide binding,

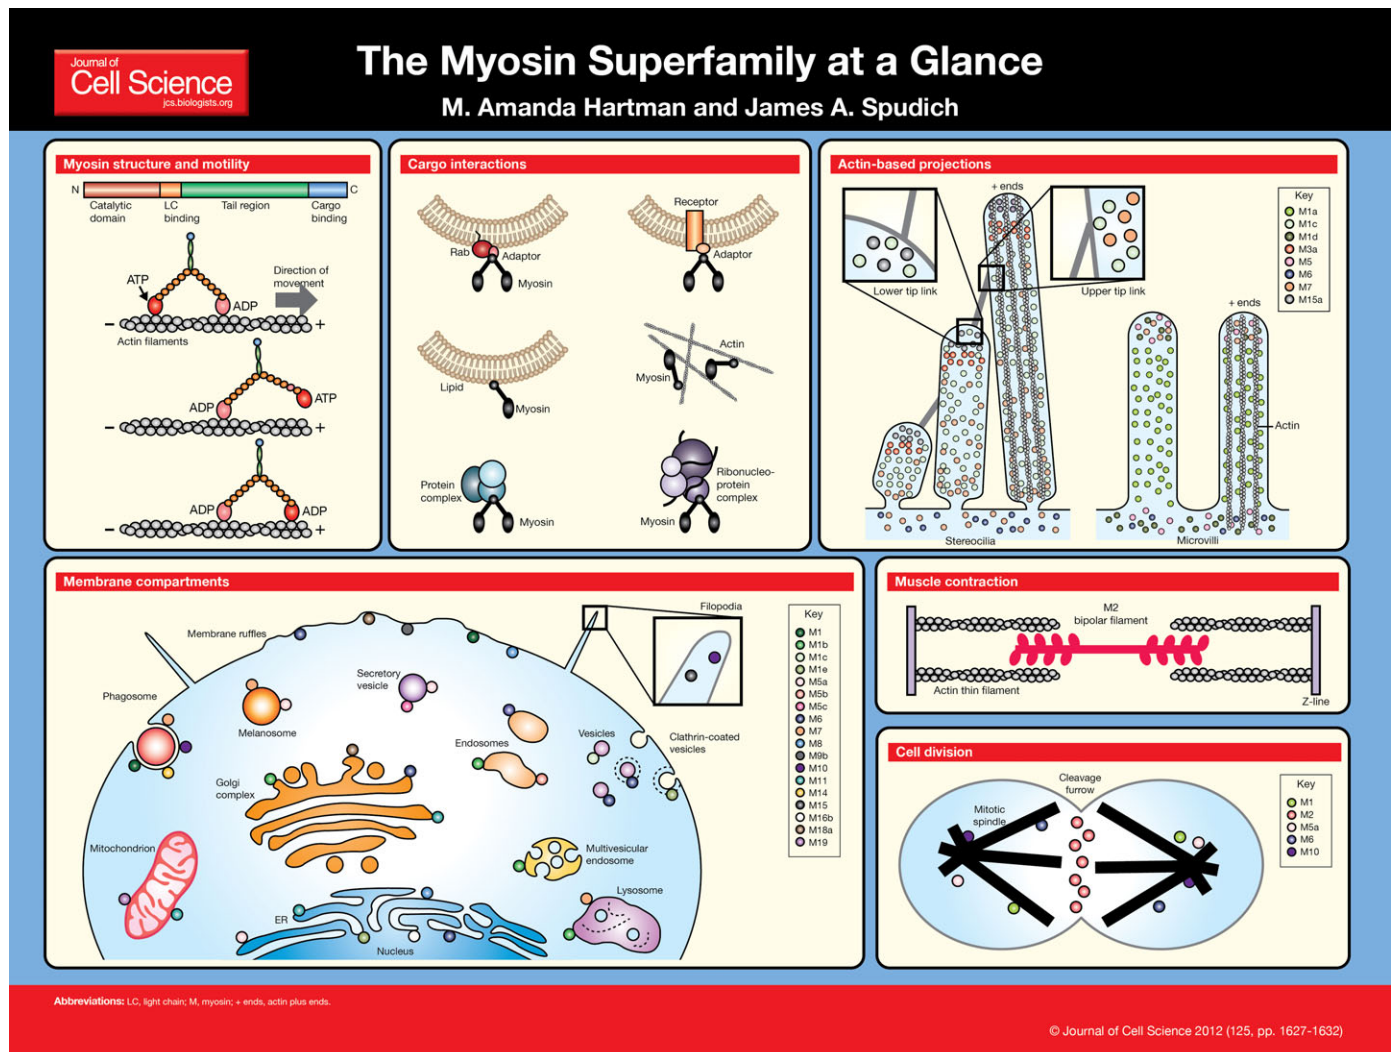

hydrolysis and product release are crucial for the productive motility of myosin enzymes. In the absence of nucleotide and in the ADP-bound state, the head interacts strongly with actin. By contrast, when ATP or ADP bound to inorganic phosphate (ADP- $P_i$ ) bind to the catalytic domain, the affinity of the myosin head for actin is drastically lower. Thus, association of myosin with its filamentous track is regulated by the ATPase cycle. Myosins vary in the rate at which they use ATP and in how long per ATPase cycle they are in the strongly bound state (duty ratio). Some motor proteins, such as M2, have low duty ratios, and each myosin head spends little time in association with actin. Others, such as M5, move processively for many steps before detaching – a characteristic that results from a high duty ratio (Howard, 1997).

Muscle and non-muscle M2, both of which are the conventional members of the myosin superfamily, form bipolar filaments that consist of dozens of myosin molecules. M5 and other unconventional myosins do not form such bipolar thick filaments. Some unconventional myosins, such as M5, have two heads and can take many steps along an actin filament as a single molecule. In these cases, the ATPase cycles of the two identical heads are staggered, such that at least one head is strongly bound to actin at any time. Following the binding of ATP, the rear head dissociates from the filament, which allows the front head to undergo a lever arm swing, thereby propelling the rear head forward. After the hydrolysis of ATP and the release of phosphate, the former rear head attaches to actin in its new front position (De La Cruz and Ostap, 2004).

The changes in nucleotide state are associated with large movements, such as the 36-nm step taken by M5. These movements are enabled by the myosin lever arm, which amplifies the conformational changes in the catalytic domain to generate step sizes that directly depend on the length of the lever arm. In most myosins, the lever arm is a region of the heavy chain to which one or more calmodulin or calmodulin-like light chains bind and provide rigidity. In other members of the myosin family, such as M6 and M10, a single  $\alpha$ -helix domain in this neck region may also contribute to the step size (Baboolal et al., 2009; Knight et al., 2005; Spudich and Sivaramakrishnan, 2010).

### Myosins contribute to muscle contraction and cytokinesis

The first myosin, M2, was discovered 1864 – in Heidelberg by Willy Kühne – in muscle extracts (Kühne, 1864). We now know how this muscle M2, which is localized in the so-called muscle A-bands, works. The conventional class 2 myosins have long coiled-coil domains that allow multimerization to take place. Thus, interactions between charged residues within these dimers mediate the formation of bipolar thick filaments that are responsible for contraction of muscle and cytokinesis. Each bipolar thick filament consists of dozens of myosin molecules that face opposite directions from the midzone of the filament. In muscle, these thick filaments are at the center of the functional unit of the muscle, the sarcomere. The sarcomere also consists of two sets of actin filaments, which are attached at their plus ends to structures at the ends of the sarcomere called Z-lines. All actin filaments are directed with their minus ends toward the center of the sarcomere. The thick myosin filaments and thin actin filaments interdigitate and slide past each other by repetitive interactions between the myosin heads and the actin filaments, resulting in the two Z-lines being pulled closer together. Sarcomeres are attached to each other in series by way of their Z-lines, and the contraction of the sarcomeres, thus, leads to contraction of the entire muscle.

Similarly, non-muscle M2 bipolar thick filaments provide the force of contraction needed to separate the two daughter cells during cytokinesis (Vicente-Manzanares et al., 2009). Additional myosins appear to be involved in cell division; for example, M6 participates in membrane trafficking towards the cytokinetic furrow (Arden et al., 2007). Other myosins localize to the microtubule-based mitotic spindle, which directs the position of the cell division furrow. Human M10 and *Dictyostelium* M1 have been shown to be required for correct spindle formation (Rump et al., 2011; Woolner et al., 2008), and M5a has been found at spindle poles, although its function at this location remains unclear (Espreafico et al., 1998; Wu et al., 1998).

### Unconventional myosins associate with cargoes

The diversity of the myosin superfamily becomes particularly evident in the variety of domains that are found in the C-terminal

tail of these proteins. Whereas the catalytic heads share a number of conserved elements, the tail regions of the various myosin classes are highly divergent (Thompson and Langford, 2002). The unconventional myosins possess specific domains in their tail regions that are thought to enable their individual cellular functions through association with adaptors and other binding proteins (Akhmanova and Hammer, 2010).

Myosins localize to a number of intracellular compartments and participate in many trafficking and anchoring events. The recruitment of motor proteins to an organelle or molecular complex is generally the result of the tail binding to a specific adaptor protein. A number of myosin-binding proteins have been discovered, and their identities have often provided information that is essential to understanding the cellular functions of these motor proteins (Akhmanova and Hammer, 2010). Most of these interactions fall into one of several themes, which we discuss below.

One of these themes is the connection between myosins and members of the Rab protein family through adaptor proteins. For example, in melanocytes a complex containing Rab27a, the adaptor protein melanophilin and M5a is involved in directed migration of pigment-containing vesicles in these cells. Also, Rab27a, M7a and Rab-interacting protein (MyRIP) and M7a have been shown to interact in retinal pigment epithelial cells (Van Gele et al., 2009).

Other myosins are involved in the trafficking of cell surface receptors. For example, M6 associates with the megalin receptor through the adaptor protein GIPC (GAIP interacting protein, C terminus) and, thereby, permits correct targeting of the receptor to the base of microvilli in kidney proximal tubule cells (Naccache et al., 2006). Representing another type of interaction, many class 1 myosins directly associate with lipids instead of binding adaptor proteins, which allows them to function during membrane tension (McConnell and Tyska, 2010). By contrast, certain yeast class 1 myosins have additional actin-binding sites in their tails and contribute to filament nucleation (Kim and Flavell, 2008).

Some myosins are thought to associate with large protein complexes, such as vertebrate M7a (Kussel-Andermann et al., 2000) and *Drosophila* M6 (Finan et al., 2011). In these examples, the myosin

potentially stabilizes its cargo in a certain position or transport the complex to a specific destination. Myosins are also responsible for the directed movement of ribonucleoprotein complexes, such as the movement of protein-bound *ASH1* mRNA, which encodes a transcription factor that ensures mating-type switching in the newly budded daughter cell (Paquin and Chartrand, 2008) by the yeast class 5 myosin Myo4p during budding division.

These examples are only a few of the cargoes discovered for myosin proteins, but many others fall into one of the six general categories described. Because myosin-binding proteins recruit myosins to specific subcellular locations, they enable these motors to associate with their targets. Once targeted to an organelle, vesicle or protein complex, the motor protein can then exert its effects on their movement or anchoring. Through their specific interactions, myosins are able to carry out a number of functions in many different cell types, and their importance is highlighted by their roles in actin-based projections.

#### Myosins have roles in actin-based projections

Many myosins localize to membrane extensions, including stereocilia and microvilli, which are supported by large actin bundles. Stereocilia are found in hair cells of the inner ear and contribute to auditory mechanotransduction. Microvilli project from epithelial cells, including those that line the intestines and ducts of the kidneys; particular focus has been placed on examining the roles of myosins in the brush borders of the intestine and kidney, which function in absorption. In both types of structure, actin is oriented such that the plus (barbed) end is at the distal tip (Nambiar et al., 2010). Although all characterized myosins, with the exception of M6 (Wells et al., 1999), move towards the plus end, they are not evenly distributed throughout stereocilia and microvilli; their specific positions at, for example, the base or tip of these projections are likely to be a reflection of their specific functions.

For example, M15a is found at the tip of stereocilia (Belyantseva et al., 2003), whereas M7a is present throughout the length of the stereocilium and possibly concentrated near its base (Hasson et al., 1997; Senften et al., 2006). Each of these two motors associates with several adhesion or scaffolding proteins and

contributes to the organization of stereocilia (Nambiar et al., 2010). Although M1c localizes along the length of stereocilia (Schneider et al., 2006), it is thought to function where it is concentrated, i.e. near the ciliary tip links – linkages connect neighboring stereocilia and are perturbed by sound waves during the hearing process (Gillespie and Cyr, 2004; Hasson et al., 1997; Steyger et al., 1998). In addition, M7a was recently identified as a component of the upper tip link (Grati and Kachar, 2011). Both M6 and M7a are found below the base of stereocilia (Hasson et al., 1997), and in the case of M6, the myosin protein is thought to ensure correct membrane tension that is required for the maintenance of these projections (Altman et al., 2004; Nambiar et al., 2010). M3a, however, is concentrated below the tip (Schneider et al., 2006), and is involved in transporting the actin-bundling protein espin 1 away from the cell body to ensure correct assembly and elongation of actin (Salles et al., 2009).

Many of the myosins that are found in stereocilia are also found in microvilli of the brush border. Again, M6 is concentrated near the base, as are M5 and M1d (Benesh et al., 2010; Heintzelman et al., 1994). In addition to M5 and M7b, M1d is also present in the tips of microvilli, whereas M1a is present along the entire length of the microvillus (Benesh et al., 2010; Heintzelman et al., 1994). Although the specific functions of each myosin in these projections are less clear than in, for example, stereocilia, they might carry out essential functions in the regulation of actin structure and general cilia organization. Interestingly, it was recently demonstrated that M1a is essential for the shedding of vesicles from microvilli (McConnell et al., 2009; McConnell and Tyska, 2007), which suggests that other myosins also participate in membrane trafficking in cells containing these structures. Indeed, many myosins have been connected to a variety of membrane compartments.

#### Myosins organize the endomembrane system

Myosins can be found in nearly any cellular location, where they are thought to link each cargo to the actin cytoskeleton for transport and/or anchoring. For example, type 1 and 6 myosins are associated with endocytic vesicles and endosomes (Chen et al., 2007; Hasson,

2003; Krendel et al., 2007; Puri et al., 2010; Raposo et al., 1999; Salas-Cortes et al., 2005; Wang et al., 2008) and M5b also colocalizes with endosomal compartments (Wang et al., 2008). Both M1b and M7a have been found on lysosomal membranes (Raposo et al., 1999; Soni et al., 2005). By contrast, M10, *Tetrahymena* M14, and *Dictyostelium* M1 and M7 associate with phagocytic cups or phagosomes (Cox et al., 2002; Hosein and Gavin, 2007; Rump et al., 2011; Tuxworth et al., 2001). In addition, M5a and M5c contribute to the exocytosis of dense-core vesicles and secretory granules, respectively (Jacobs et al., 2009; Varadi et al., 2005).

Other types of myosin involved in secretion include M1b, M6 and M18a, each of which is found on the Golgi complex (Almeida et al., 2011; Dippold et al., 2009; Spudich and Sivaramakrishnan, 2010). M5a probably transports the peripheral endoplasmic reticulum (ER) to dendritic spines in neuronal cells (Wagner et al., 2011). M9b and many class 1 myosins associate with the plasma membrane (McConnell and Tyska, 2010; van den Boom et al., 2007), and M6 and M18a are found in membrane ruffles (Buss et al., 1998; Hsu et al., 2010). Mammalian M10 and *Drosophila* M15 concentrate in filopodia, which are cellular extensions that are often found at the leading edge of migrating cells. Whereas M10 is involved in filopodial formation, M15 is thought to carry out filopodial transport (Berg and Cheney, 2002; Liu et al., 2008).

Recent data indicate that M19 is responsible for the transport of mitochondria in human cells (Quintero et al., 2009), whereas in maize it seems to be M11 (Wang and Pesacreta, 2004). In *Arabidopsis*, M8 and M11 are responsible for many long-range movements of organelles and are found, for example, on the Golgi, ER and plasma membrane (Sparkes, 2010). In addition, although myosins are generally restricted to the cytoplasm, members of several classes, including M1c, M6 and M16b, have been found in the nucleus and might function there (Woolner and Bement, 2009).

The locations of myosins presented here are certainly not comprehensive, and future work is essential to fully define the subcellular localizations and cargo complexes of myosin motor proteins. Although we have focused on the unconventional members, M2 has also been implicated in numerous functions

**Table 1. Phenotypes associated with myosin mutations**

| Myosin                    | Organism | Phenotype                     | Reference                                  |
|---------------------------|----------|-------------------------------|--------------------------------------------|
| M1a                       | Human    | Deafness                      | (Donaudy et al., 2003)                     |
| M1c                       | Human    | Deafness                      | (Zadro et al., 2009)                       |
| M31DF (class 1)           | Fly      | Situs inversus                | (Hozumi et al., 2006; Speder et al., 2006) |
| Cardiac muscle M2         | Human    | Hypertrophic cardiomyopathy   | (Walsh et al., 2010)                       |
| Cardiac muscle M2         | Human    | Dilated cardiomyopathy        | (Walsh et al., 2010)                       |
| Non-muscle M2a            | Human    | May-Hegglin anomaly           | (Kunishima and Saito, 2010)                |
| Non-muscle M2a            | Human    | Deafness                      | (Kunishima and Saito, 2010)                |
| M3a                       | Human    | Deafness                      | (Walsh et al., 2002)                       |
| M5a                       | Human    | Griscelli syndrome            | (Van Gele et al., 2009)                    |
| M5b                       | Human    | Microvillus inclusion disease | (Muller et al., 2008)                      |
| M6                        | Human    | Deafness                      | (Melchionda et al., 2001)                  |
| M6                        | Human    | Hypertrophic cardiomyopathy   | (Mohiddin et al., 2004)                    |
| M7a                       | Human    | Usher syndrome                | (Kremer et al., 2006)                      |
| M7a                       | Human    | Deafness                      | (Liu et al., 1997)                         |
| Crinkled (class 7 myosin) | Fly      | Deafness                      | (Todi et al., 2005)                        |
| M9a                       | Mouse    | Hydrocephalus                 | (Abouhamed et al., 2009)                   |
| M15a                      | Human    | Deafness                      | (Wang et al., 1998)                        |
| M18b                      | Mouse    | Heart defects                 | (Ajima et al., 2008)                       |

beyond muscle contraction and cytokinesis, such as cell adhesion, rearrangement and cell polarity (Vicente-Manzanares et al., 2009). Determining the extent to which myosins and other motor proteins cooperate to organize cellular contents is an emerging area of research, which may progress further by deducing the phenotypes associated with myosin loss-of-function.

**Mutations in myosins can cause disease**  
 Numerous myosin mutations have been linked to disease states and genetic syndromes (Table 1), and myosins are necessary for the process of hearing through their contribution to the structure of stereocilia (Nambiar et al., 2010). Mutations in M7a can lead to non-syndromic deafness or Usher syndrome, the leading cause of genetic deaf-blindness (Kremer et al., 2006). M5b might transport apical endosomes in brush border cells (Szperl et al., 2011), which could explain the association of mutations in this gene with microvillus inclusion disease (Muller et al., 2008). Furthermore, mutations in M5a are linked to Griscelli syndrome, which is characterized by defects in pigmentation and neuronal malfunction (Van Gele et al., 2009).

Because class 2 myosins are essential for muscle contraction, cell division and other fundamental processes, mutations in the genes encoding these proteins can lead to severe forms of disease. For example, mutations in cardiac M2 can cause cardiomyopathies, which are characterized by malformation and dysfunction of the heart (Walsh et al., 2010). M6 and M18b have also been linked to heart defects, although the molecular basis for these phenotypes is not

known (Ajima et al., 2008; Mohiddin et al., 2004). Furthermore, it is unclear what the specific roles for *Drosophila* M1 and mouse M9a are, whose disruption leads to reversal of organ polarity and hydrocephalus, respectively (Abouhamed et al., 2009; Hozumi et al., 2006; Speder et al., 2006).

Although M9b has been linked to a number of intestinal disease states, there is some controversy over these genetic associations. Two studies implicated this motor protein in celiac disease (Monsuur, 2005; Wolters, 2007), but other data indicate that this association is absent in a number of populations (Hunt, 2006; Amundsen, 2006a; Nunez, 2006; Cirillo, 2007; Koskinen, 2008). Furthermore, whereas M9b has been linked to inflammatory bowel diseases (Latiano, 2008; Nunez, 2007; van Bodegraven, 2006; Cooney, 2009), this might not be the case for all cohorts (Amundsen, 2006b), which adds to the debate about the function of this motor protein.

### Perspectives

The molecular basis of energy transduction by the myosin family of molecular motors is reasonably well understood after decades of research using many different approaches. Similarly, the cellular functions of M2 in muscle contraction and cytokinesis can be fairly well described at the molecular level. The cellular roles of other members of the myosin family are beginning to be elucidated, but there is still much work to do in this fruitful research area. It is clear that the ~40 different myosins in a particular cell type are involved in setting up the dynamic layout of the cell. However, the

multitude of cargo-binding, structural and regulatory elements that must exist to direct the numerous myosin motor proteins to carry out their various functions inside the cell have not yet been identified and characterized. The field is at the tip of an iceberg with respect to such much-needed biochemical studies, and future research should certainly consider cargo-binding elements of molecular motors as one of the upcoming frontiers in the research of molecular motors.

The time is also ripe to focus on the clinical ramifications of alterations to the actin–myosin contractile system associated with particular disease states. A classic example is the hundreds of sarcomeric protein mutations that, individually, lead to hypertrophic or dilated cardiomyopathy – debilitating diseases that can lead to sudden death. These days, the connection between basic research and its application in the treatment of diseases is much easier to forge in this modern era of genomic biology – and the biotech world is not far behind. A therapeutic approach that directly targets  $\beta$ -cardiac myosin has recently been reported as a potential treatment for congestive heart failure (Malik et al., 2011), a prevalent disease in great need of new therapeutic approaches. The next decade will see much more activity bridging basic science, and clinical and therapeutic approaches to the myosin family of molecular motors.

### Funding

This work was supported by the National Institutes of Health [grant number GM33289 to J.A.S.]; a Human Frontiers

Science Program grant to J.A.S.; the National Institutes of Health Cell and Molecular Biology Training [grant number T32GM007276 to M.A.H.]; and a Stanford Graduate Fellowship awarded to M.A.H. Deposited in PMC for release after 12 months.

A high-resolution version of the poster is available for downloading in the online version of this article at [jcs.biologists.org](http://jcs.biologists.org). Individual poster panels are available as JPEG files at <http://jcs.biologists.org/lookup/suppl/doi:10.1242/jcs.094300/-/DC1>.

## References

- Abouhamed, M., Grobe, K., I. V., Thelen, S., Honnert, U., Balda, M. S., Matter, K. and Bahler, M. (2009). Myosin IXa regulates epithelial differentiation and its deficiency results in hydrocephalus. *Mol. Biol. Cell* **20**, 5074-5085.
- Ajima, R., Akazawa, H., Kodama, M., Takeshita, F., Otsuka, A., Kohno, T., Komuro, I., Ochiya, T. and Yokota, J. (2008). Deficiency of Myo18B in mice results in embryonic lethality with cardiac myofibrillar aberrations. *Genes Cells* **13**, 987-999.
- Akhmanova, A. and Hammer, J. A., 3rd (2010). Linking molecular motors to membrane cargo. *Curr. Opin. Cell Biol.* **22**, 479-487.
- Almeida, C. G., Yamada, A., Tenza, D., Louvard, D., Raposo, G. and Coudrier, E. (2011). Myosin 1b promotes the formation of post-Golgi carriers by regulating actin assembly and membrane remodelling at the trans-Golgi network. *Nat. Cell Biol.* **13**, 779-789.
- Altman, D., Sweeney, H. L. and Spudich, J. A. (2004). The mechanism of myosin VI translocation and its load-induced anchoring. *Cell* **116**, 737-749.
- Amundsen, S. S., Monsuur, A. J., Wapenaar, M. C., Lie, B. A., Ek, J., Gudjonsdottir, A. H., Ascher, H., Wijmenga, C. and Sollid, L. M. (2006a). Association analysis of MYO9B gene polymorphisms with celiac disease in a Swedish/Norwegian cohort. *Hum. Immunol.* **67**, 341-345.
- Amundsen, S. S., Vatn, M., Wijmenga, C., Sollid, L. M. and Lie, B. A. (2006b). Association analysis of MYO9B gene polymorphisms and inflammatory bowel disease in a Norwegian cohort. *Tissue Antigens* **68**, 249-252.
- Arden, S. D., Puri, C., Au, J. S., Kendrick-Jones, J. and Buss, F. (2007). Myosin VI is required for targeted membrane transport during cytokinesis. *Mol. Biol. Cell* **18**, 4750-4761.
- Baboolal, T. G., Sakamoto, T., Forgacs, E., White, H. D., Jackson, S. M., Takagi, Y., Farrow, R. E., Molloy, J. E., Knight, P. J., Sellers, J. R. et al. (2009). The SAH domain extends the functional length of the myosin lever. *Proc. Natl. Acad. Sci. USA* **106**, 22193-22198.
- Belyantseva, I. A., Boger, E. T. and Friedman, T. B. (2003). Myosin XVa localizes to the tips of inner ear sensory cell stereocilia and is essential for staircase formation of the hair bundle. *Proc. Natl. Acad. Sci. USA* **100**, 13958-13963.
- Benesh, A. E., Nambiar, R., McConnell, R. E., Mao, S., Tabb, D. L. and Tyska, M. J. (2010). Differential localization and dynamics of class I myosins in the enterocyte microvillus. *Mol. Biol. Cell* **21**, 970-978.
- Berg, J. S. and Cheney, R. E. (2002). Myosin-X is an unconventional myosin that undergoes intrafilopodial motility. *Nat. Cell Biol.* **4**, 246-250.
- Buss, F., Kendrick-Jones, J., Lionne, C., Knight, A. E., Cote, G. P. and Paul Luzio, J. (1998). The localization of myosin VI at the golgi complex and leading edge of fibroblasts and its phosphorylation and recruitment into membrane ruffles of A431 cells after growth factor stimulation. *J. Cell Biol.* **143**, 1535-1545.
- Chen, X. W., Leto, D., Chiang, S. H., Wang, Q. and Saltiel, A. R. (2007). Activation of RalA is required for insulin-stimulated Glut4 trafficking to the plasma membrane via the exocyst and the motor protein Myo1c. *Dev. Cell* **13**, 391-404.
- Cirillo, G., Di Domenico, M. R., Corsi, I., Gagliardo, T., Del Giudice, E. M., Perrone, L. and Tolone, C. (2007). Do MYO9B genetic variants predispose to coeliac disease? An association study in a cohort of South Italian children. *Dig. Liver Dis.* **39**, 228-231.
- Cooney, R., Cummings, J. R., Pathan, S., Beckly, J., Geremia, A., Hancock, L., Guo, C., Morris, A. and Jewell, D. P. (2009). Association between genetic variants in myosin IXB and Crohn's disease. *Inflamm. Bowel Dis.* **15**, 1014-1021.
- Cox, D., Berg, J. S., Cammer, M., Chingewundoh, J. O., Dale, B. M., Cheney, R. E. and Greenberg, S. (2002). Myosin X is a downstream effector of PI(3)K during phagocytosis. *Nat. Cell Biol.* **4**, 469-477.
- De La Cruz, E. M. and Ostap, E. M. (2004). Relating biochemistry and function in the myosin superfamily. *Curr. Opin. Cell Biol.* **16**, 61-67.
- Dippold, H. C., Ng, M. M., Farber-Katz, S. E., Lee, S. K., Kerr, M. L., Peterman, M. C., Sim, R., Wiharto, P. A., Galbraith, K. A., Madhavarapu, S. et al. (2009). GOLPH3 bridges phosphatidylinositol-4-phosphate and actomyosin to stretch and shape the Golgi to promote budding. *Cell* **139**, 337-351.
- Donaudy, F., Ferrara, A., Esposito, L., Hertzano, R., Ben-David, O., Bell, R. E., Melchionda, S., Zelante, L., Avraham, K. B. and Gasparini, P. (2003). Multiple mutations of MYO1A, a cochlear-expressed gene, in sensorineural hearing loss. *Am. J. Hum. Genet.* **72**, 1571-1577.
- Espreafoico, E. M., Coling, D. E., Tsakraklides, V., Krogh, K., Wolenski, J. S., Kalincec, G. and Kachar, B. (1998). Localization of myosin-V in the centrosome. *Proc. Natl. Acad. Sci. USA* **95**, 8636-8641.
- Finan, D., Hartman, M. A. and Spudich, J. A. (2011). Proteomics approach to study the functions of Drosophila myosin VI through identification of multiple cargo-binding proteins. *Proc. Natl. Acad. Sci. USA* **108**, 5566-5571.
- Foth, B. J., Goedecke, M. C. and Soldati, D. (2006). New insights into myosin evolution and classification. *Proc. Natl. Acad. Sci. USA* **103**, 3681-3686.
- Gillespie, P. G. and Cyr, J. L. (2004). Myosin-1c, the hair cell's adaptation motor. *Annu. Rev. Physiol.* **66**, 521-545.
- Goode, B. L., Drubin, D. G. and Barnes, G. (2000). Functional cooperation between the microtubule and actin cytoskeletons. *Curr. Opin. Cell Biol.* **12**, 63-71.
- Grati, M. and Kachar, B. (2011). Myosin VIIa and sans localization at stereocilia upper tip-link density implicates these Usher syndrome proteins in mechanotransduction. *Proc. Natl. Acad. Sci. USA* **108**, 11476-11481.
- Hartman, M. A., Finan, D., Sivaramakrishnan, S. and Spudich, J. A. (2011). Principles of unconventional myosin function and targeting. *Annu. Rev. Cell Dev. Biol.* **27**, 133-155.
- Hasson, T. (2003). Myosin VI: two distinct roles in endocytosis. *J. Cell Sci.* **116**, 3453-3461.
- Hasson, T., Gillespie, P. G., Garcia, J. A., MacDonald, R. B., Zhao, Y., Yee, A. G., Mooseker, M. S. and Corey, D. P. (1997). Unconventional myosins in inner-ear sensory epithelia. *J. Cell Biol.* **137**, 1287-1307.
- Heintzelman, M. B., Hasson, T. and Mooseker, M. S. (1994). Multiple unconventional myosin domains of the intestinal brush border cytoskeleton. *J. Cell Sci.* **107**, 3535-3543.
- Hosein, R. E. and Gavin, R. H. (2007). Myo1 localizes to phagosomes, some of which traffic to the nucleus in a Myo1-dependent manner in *Tetrahymena* thermophila. *Cell Motil. Cytoskeleton* **64**, 926-935.
- Howard, J. (1997). Molecular motors: structural adaptations to cellular functions. *Nature* **389**, 561-567.
- Hozumi, S., Maeda, R., Taniguchi, K., Kanai, M., Shirakabe, S., Sasamura, T., Speder, P., Noselli, S., Aigaki, T., Murakami, R. et al. (2006). An unconventional myosin in *Drosophila* reverses the default handedness in visceral organs. *Nature* **440**, 798-802.
- Hsu, R. M., Tsai, M. H., Hsieh, Y. J., Lyu, P. C. and Yu, J. S. (2010). Identification of MYO18A as a novel interacting partner of the PAK2/betaPIX/GIT1 complex and its potential function in modulating epithelial cell migration. *Mol. Biol. Cell* **21**, 287-301.
- Hunt, K. A., Monsuur, A. J., McArdle, W. L., Kumar, P. J., Travis, S. P., Walters, J. R., Jewell, D. P., Strachan, D. P., Playford, R. J., Wijmenga, C. et al. (2006). Lack of association of MYO9B genetic variants with coeliac disease in a British cohort. *Gut* **55**, 969-972.
- Jacobs, D. T., Weigert, R., Grode, K. D., Donaldson, J. G. and Cheney, R. E. (2009). Myosin Vc is a molecular motor that functions in secretory granule trafficking. *Mol. Biol. Cell* **20**, 4471-4488.
- Kim, S. V. and Flavell, R. A. (2008). Myosin I: from yeast to human. *Cell Mol. Life Sci.* **65**, 2128-2137.
- Knight, P. J., Thirumurugan, K., Xu, Y., Wang, F., Kalverda, A. P., Stafford, W. F., 3rd, Sellers, J. R. and Peckham, M. (2005). The predicted coiled-coil domain of myosin 10 forms a novel elongated domain that lengthens the head. *J. Biol. Chem.* **280**, 34702-34708.
- Koskinen, L. L., Korponay-Szabo, I. R., Viiri, K., Juuti-Uusitalo, K., Kaukinen, K., Lindfors, K., Mustalahti, K., Kurppa, K., Adany, R., Pocsai, Z. et al. (2008). Myosin IXB gene region and gluten intolerance: linkage to coeliac disease and a putative dermatitis herpetiformis association. *J. Med. Genet.* **45**, 222-227.
- Kremer, H., van Wijk, E., Marker, T., Wolfrum, U. and Roepman, R. (2006). Usher syndrome: molecular links of pathogenesis, proteins and pathways. *Hum. Mol. Genet.* **15**, R262-R270.
- Krendel, M. and Mooseker, M. S. (2005). Myosins: tails (and heads) of functional diversity. *Physiology (Bethesda)* **20**, 239-251.
- Krendel, M., Osterweil, E. K. and Mooseker, M. S. (2007). Myosin 1E interacts with synaptotagmin-1 and dynamin and is involved in endocytosis. *FEBS Lett.* **581**, 644-650.
- Kühne, W. (1864). *Untersuchungen über das Protoplasma und die Contractilität*. Leipzig: W. Engelmann
- Kunishima, S. and Saito, H. (2010). Advances in the understanding of MYH9 disorders. *Curr. Opin. Hematol.* **17**, 405-410.
- Kussel-Andermann, P., El-Amraoui, A., Safieddine, S., Nouaille, S., Perfettini, I., Lecuit, M., Cossart, P., Wolfrum, U. and Petit, C. (2000). Vezatin, a novel transmembrane protein, bridges myosin VIIA to the cadherin-catenins complex. *EMBO J.* **19**, 6020-6029.
- Latiano, A., Palmieri, O., Valvano, M. R., D'Inca, R., Caprilli, R., Cucchiara, S., Sturniolo, G. C., Bossa, F., Andriulli, A. and Annese, V. (2008). The association of MYO9B gene in Italian patients with inflammatory bowel diseases. *Aliment Pharmacol. Ther.* **27**, 241-248.
- Liu, R., Woolner, S., Johndrow, J. E., Metzger, D., Flores, A. and Parkhurst, S. M. (2008). Sisyphus, the *Drosophila* myosin XV homolog, traffics within filopodia transporting key sensory and adhesion cargos. *Development* **135**, 53-63.
- Liu, X. Z., Walsh, J., Mburu, P., Kendrick-Jones, J., Cope, M. J., Steel, K. P. and Brown, S. D. (1997). Mutations in the myosin VIIA gene cause non-syndromic recessive deafness. *Nat. Genet.* **16**, 188-190.
- Malik, F. I., Hartman, J. J., Elias, K. A., Morgan, B. P., Rodriguez, H., Brejc, K., Anderson, R. L., Sueoka, S. H., Lee, K. H., Finer, J. T. et al. (2011). Cardiac myosin activation: a potential therapeutic approach for systolic heart failure. *Science* **331**, 1439-1443.
- McConnell, R. E. and Tyska, M. J. (2007). Myosin-1a powers the sliding of apical membrane along microvillar actin bundles. *J. Cell Biol.* **177**, 671-681.
- McConnell, R. E. and Tyska, M. J. (2010). Leveraging the membrane - cytoskeleton interface with myosin-1. *Trends Cell Biol.* **20**, 418-426.
- McConnell, R. E., Higginbotham, J. N., Shifrin, D. A., Jr, Tabb, D. L., Coffey, R. J. and Tyska, M. J. (2009). The enterocyte microvillus is a vesicle-generating organelle. *J. Cell Biol.* **185**, 1285-1298.
- Melchionda, S., Ahtuv, N., Biscaglia, L., Sobie, T., Glaser, F., Rabionet, R., Arbones, M. L., Notarangelo, A., Di Iorio, E., Carella, M. et al. (2001). MYO6, the human homologue of the gene responsible for deafness in Snell's waltzer mice, is mutated in autosomal dominant nonsyndromic hearing loss. *Am. J. Hum. Genet.* **69**, 635-640.
- Mohiddin, S. A., Ahmed, Z. M., Griffith, A. J., Tripodi, D., Friedman, T. B., Fananapazir, L. and Morell, R. J. (2004). Novel association of hypertrophic cardiomyopathy, sensorineural deafness, and a mutation in

- unconventional myosin VI (MYO6). *J. Med. Genet.* **41**, 309-314.
- Monsuur, A. J., de Bakker, P. I., Alizadeh, B. Z., Zhernakova, A., Bevova, M. R., Strengman, E., Franke, L., van't Slot, R., van Belzen, M. J., Lavrijssen, I. C. et al.** (2005). Myosin IXB variant increases the risk of celiac disease and points toward a primary intestinal barrier defect. *Nat. Genet.* **37**, 1341-1344.
- Muller, T., Hess, M. W., Schiefermeier, N., Pfaller, K., Ebner, H. L., Heinz-Erian, P., Ponstingl, H., Partsch, J., Rollinghoff, B., Kohler, H. et al.** (2008). MYO5B mutations cause microvillus inclusion disease and disrupt epithelial cell polarity. *Nat. Genet.* **40**, 1163-1165.
- Naccache, S. N., Hasson, T. and Horowitz, A.** (2006). Binding of internalized receptors to the PDZ domain of GIPC/synectin recruits myosin VI to endocytic vesicles. *Proc. Natl. Acad. Sci. USA* **103**, 12735-12740.
- Nambiar, R., McConnell, R. E. and Tyska, M. J.** (2010). Myosin motor function: the ins and outs of actin-based membrane protrusions. *Cell Mol. Life Sci.* **67**, 1239-1254.
- Nunez, C., Marquez, A., Varade, J., Martinez, A., Polanco, I., Maluenda, C., Fernandez-Arquero, M., de la Concha, E. G. and Urcelay, E.** (2006). No evidence of association of the MYO9B polymorphisms with celiac disease in the Spanish population. *Tissue Antigens* **68**, 489-492.
- Nunez, C., Oliver, J., Mendoza, J. L., Gomez-Garcia, M., Pinero, A., Taxonera, C., Diaz-Rubio, M., Lopez-Nevot, M. A., de la Concha, E. G., Nieto, A. et al.** (2007). MYO9B polymorphisms in patients with inflammatory bowel disease. *Gut* **56**, 1321-1322.
- Odonrutz, F. and Kollmar, M.** (2007). Drawing the tree of eukaryotic life based on the analysis of 2,269 manually annotated myosins from 328 species. *Genome Biol.* **8**, R196.
- Paquin, N. and Chartrand, P.** (2008). Local regulation of mRNA translation: new insights from the bud. *Trends Cell Biol.* **18**, 105-111.
- Puri, C., Chibalina, M. V., Arden, S. D., Kruppa, A. J., Kendrick-Jones, J. and Buss, F.** (2010). Overexpression of myosin VI in prostate cancer cells enhances PSA and VEGF secretion, but has no effect on endocytosis. *Oncogene* **29**, 188-200.
- Quintero, O. A., DiVito, M. M., Adikes, R. C., Kortan, M. B., Case, L. B., Lier, A. J., Panaretos, N. S., Slater, S. Q., Rengarajan, M., Feliu, M. et al.** (2009). Human Myo19 is a novel myosin that associates with mitochondria. *Curr. Biol.* **19**, 2008-2013.
- Raposo, G., Cordonnier, M. N., Tenza, D., Menichi, B., Durrbach, A., Louvard, D. and Coudrier, E.** (1999). Association of myosin I alpha with endosomes and lysosomes in mammalian cells. *Mol. Biol. Cell* **10**, 1477-1494.
- Ross, J. L., Ali, M. Y. and Warshaw, D. M.** (2008). Cargo transport: molecular motors navigate a complex cytoskeleton. *Curr. Opin. Cell Biol.* **20**, 41-47.
- Rump, A., Scholz, T., Thiel, C., Hartmann, F. K., Uta, P., Hinrichs, M. H., Taft, M. H. and Tsiavalariis, G.** (2011). Myosin-1C associates with microtubules and stabilizes the mitotic spindle during cell division. *J. Cell Sci.* **124**, 2521-2528.
- Salas-Cortes, L., Ye, F., Tenza, D., Wilhelm, C., Theos, A., Louvard, D., Raposo, G. and Coudrier, E.** (2005). Myosin Ib modulates the morphology and the protein transport within multi-vesicular sorting endosomes. *J. Cell Sci.* **118**, 4823-4832.
- Salles, F. T., Merritt, R. C., Jr, Manor, U., Dougherty, G. W., Sousa, A. D., Moore, J. E., Yengo, C. M., Dose, A. C. and Kachar, B.** (2009). Myosin IIIa boosts elongation of stereocilia by transporting espin 1 to the plus ends of actin filaments. *Nat. Cell Biol.* **11**, 443-450.
- Schneider, M. E., Dose, A. C., Salles, F. T., Chang, W., Erickson, F. L., Burnside, B. and Kachar, B.** (2006). A new compartment at stereocilia tips defined by spatial and temporal patterns of myosin IIIa expression. *J. Neurosci.* **26**, 10243-10252.
- Senften, M., Schwander, M., Kazmierczak, P., Lillo, C., Shin, J. B., Hasson, T., Geleoc, G. S., Gillespie, P. G., Williams, D., Holt, J. R. et al.** (2006). Physical and functional interaction between protocadherin 15 and myosin VIIa in mechanosensory hair cells. *J. Neurosci.* **26**, 2060-2071.
- Soni, L. E., Warren, C. M., Bucci, C., Orten, D. J. and Hasson, T.** (2005). The unconventional myosin-VIIa associates with lysosomes. *Cell Motil. Cytoskeleton* **62**, 13-26.
- Sparkes, I. A.** (2010). Motoring around the plant cell: insights from plant myosins. *Biochem. Soc. Trans.* **38**, 833-838.
- Speder, P., Adam, G. and Noselli, S.** (2006). Type ID unconventional myosin controls left-right asymmetry in *Drosophila*. *Nature* **440**, 803-807.
- Spudis, J. A. and Sivaramakrishnan, S.** (2010). Myosin VI: an innovative motor that challenged the swinging lever arm hypothesis. *Nat. Rev. Mol. Cell Biol.* **11**, 128-137.
- Steyger, P. S., Gillespie, P. G. and Baird, R. A.** (1998). Myosin Ibeta is located at tip link anchors in vestibular hair bundles. *J. Neurosci.* **18**, 4603-4615.
- Szperl, A. M., Golachowska, M. R., Bruinenberg, M., Prekeris, R., Thunnissen, A. M., Karrenbeld, A., Dijkstra, G., Hoekstra, D., Mercer, D., Ksiazyk, J. et al.** (2011). Functional characterization of mutations in the myosin Vb gene associated with microvillus inclusion disease. *J. Pediatr. Gastroenterol. Nutr.* **52**, 307-313.
- Thompson, R. F. and Langford, G. M.** (2002). Myosin superfamily evolutionary history. *Anat. Rec.* **268**, 276-289.
- Todi, S. V., Franke, J. D., Kiehart, D. P. and Eberl, D. F.** (2005). Myosin VIIA defects, which underlie the Usher 1B syndrome in humans, lead to deafness in *Drosophila*. *Curr. Biol.* **15**, 862-868.
- Tuxworth, R. I., Weber, I., Wessels, D., Addicks, G. C., Soll, D. R., Gerisch, G. and Titus, M. A.** (2001). A role for myosin VII in dynamic cell adhesion. *Curr. Biol.* **11**, 318-329.
- van Bodegraven, A. A., Curley, C. R., Hunt, K. A., Monsuur, A. J., Linskens, R. K., Onnie, C. M., Crusius, J. B., Annese, V., Latiano, A., Silverberg, M. S. et al.** (2006). Genetic variation in myosin IXB is associated with ulcerative colitis. *Gastroenterology* **131**, 1768-1774.
- van den Boom, F., Dussmann, H., Uhlenbrock, K., Abouhamed, M. and Bahler, M.** (2007). The Myosin Ixb motor activity targets the myosin Ixb RhoGAP domain as cargo to sites of actin polymerization. *Mol. Biol. Cell* **18**, 1507-1518.
- Van Gele, M., Dynoedt, P. and Lambert, J.** (2009). Griscelli syndrome: a model system to study vesicular trafficking. *Pigment Cell Melanoma Res.* **22**, 268-282.
- Varadi, A., Tsuboi, T. and Rutter, G. A.** (2005). Myosin Va transports dense core secretory vesicles in pancreatic MIN6 beta-cells. *Mol. Biol. Cell* **16**, 2670-2680.
- Vicente-Manzanares, M., Ma, X., Adelstein, R. S. and Horwitz, A. R.** (2009). Non-muscle myosin II takes centre stage in cell adhesion and migration. *Nat. Rev. Mol. Cell Biol.* **10**, 778-790.
- Wagner, W., Brenowitz, S. D. and Hammer, J. A., 3rd.** (2011). Myosin-Va transports the endoplasmic reticulum into the dendritic spines of Purkinje neurons. *Nat. Cell Biol.* **13**, 40-48.
- Walsh, R., Rutland, C., Thomas, R. and Loughna, S.** (2010). Cardiomyopathy: a systematic review of disease-causing mutations in myosin heavy chain 7 and their phenotypic manifestations. *Cardiology* **115**, 49-60.
- Walsh, T., Walsh, V., Vreugde, S., Hertzano, R., Shahin, H., Haika, S., Lee, M. K., Kanaan, M., King, M. C. and Avraham, K. B.** (2002). From flies' eyes to our ears: mutations in a human class III myosin cause progressive nonsyndromic hearing loss DFNB30. *Proc. Natl. Acad. Sci. USA* **99**, 7518-7523.
- Wang, A., Liang, Y., Fridell, R. A., Probst, F. J., Wilcox, E. R., Touchman, J. W., Morton, C. C., Morell, R. J., Noben-Trauth, K., Camper, S. A. et al.** (1998). Association of unconventional myosin MYO15 mutations with human nonsyndromic deafness DFNB3. *Science* **280**, 1447-1451.
- Wang, Z. and Pesacreta, T. C.** (2004). A subclass of myosin XI is associated with mitochondria, plastids, and the molecular chaperone subunit TCP-1alpha in maize. *Cell Motil. Cytoskeleton* **57**, 218-232.
- Wang, Z., Edwards, J. G., Riley, N., Provance, D. W., Jr, Karcher, R., Li, X. D., Davison, I. G., Ikebe, M., Mercer, J. A., Kauer, J. A. et al.** (2008). Myosin Vb mobilizes recycling endosomes and AMPA receptors for postsynaptic plasticity. *Cell* **135**, 535-548.
- Wells, A. L., Lin, A. W., Chen, L. Q., Safer, D., Cain, S. M., Hasson, T., Carragher, B. O., Milligan, R. A. and Sweeney, H. L.** (1999). Myosin VI is an actin-based motor that moves backwards. *Nature* **401**, 505-508.
- Wolters, V. M., Verbeek, W. H., Zhernakova, A., Onland-Moret, C., Schreurs, M. W., Monsuur, A. J., Verduijn, W., Wijmenga, C. and Mulder, C. J.** (2007). The MYO9B gene is a strong risk factor for developing refractory celiac disease. *Clin. Gastroenterol. Hepatol.* **5**, 1399-1405, 1405 e1-2.
- Woolner, S. and Bement, W. M.** (2009). Unconventional myosins acting unconventionally. *Trends Cell Biol.* **19**, 245-252.
- Woolner, S., O'Brien, L. L., Wiese, C. and Bement, W. M.** (2008). Myosin-10 and actin filaments are essential for mitotic spindle function. *J. Cell Biol.* **182**, 77-88.
- Wu, X., Koehler, B., Wei, Q. and Hammer, J. A., 3rd** (1998). Myosin Va associates with microtubule-rich domains in both interphase and dividing cells. *Cell Motil. Cytoskeleton* **40**, 286-303.
- Zadro, C., Alemanno, M. S., Bellacchio, E., Ficarella, R., Donaudy, F., Melchionda, S., Zelante, L., Rabionet, R., Hilgert, N., Estivill, X. et al.** (2009). Are MYO1C and MYO1F associated with hearing loss? *Biochim. Biophys. Acta.* **1792**, 27-32.
